# Supplementary material for: Coal Mining Activities Driving the Changes in Microbial Community and Hydrochemical Characteristics of Underground Mine Water
Source: MDPI journal article supplement (doi:10.3390/ijerph192013359), 2022-10-16
Supplement: s1 [file s1]

**Coal mining activities driving the changes in microbial community and  
hydrochemical characteristic of underground mine water**

Li Zhang<sup>a</sup> Zhimin Xu<sup>a,b\*</sup> Yajun Sun<sup>a,b</sup> Yating Gao<sup>a</sup> Lulu Zhu<sup>a</sup>

*a School of Resources and Geosciences, China University of Mining and Technology,  
Xuzhou, Jiangsu 221116, China.*

*b Fundamental Research Laboratory for Mine Water Hazards Prevention and  
Controlling Technology, Xuzhou, Jiangsu 221006, China*

**Corresponding author:**

**Zhimin Xu**

School of Resources and Geosciences, China University of Mining and Technology,  
Xuzhou, Jiangsu 221116, China

E-mail: xuzhimin@cumt.edu.cn

Tel. +86-13775978891

## **Materials and methods—sampling points design**

The groundwater from water-filling aquifers was the origination of mine water. Rock roadway referred to the roadway with the rock area higher than 80% in the excavation section, which was mainly used for ventilation, transportation equipment and materials, etc. The 4 rock roadways sampling points passed through the L<sub>3</sub> limestone aquifer. Thus, most of the rock roadways water originated from the L<sub>3</sub> limestone groundwater and collected in the drainage ditches of the rock roadways, except for XJL14 which collected the drainage of coal roadways and rock roadways. Coal roadway referred to the roadway with coal area higher than 80% in the excavation section including pannel, which was mainly used for mining and transporting coal. The main water-filling aquifer of coal roadways was S<sub>3</sub> sandstone aquifer. After cessation of mining, a closed wall would be built to close the pannel; the pannel was called the goaf at this time. Then in goaf, the water level increased gradually and the oxygen concentrations decreased gradually with the time since goaf closure, resulting in a long-term and specific water-coal/rock reaction. Thus, the goafs closure in 2021, 2012, 2010 and 2009, whose water-filling aquifers were all S<sub>3</sub> sandstone groundwater, were selected to study the variation characteristics of microbial communities. Here, we had to make the experimental design of substituting space for time, because the microbial community and hydrochemical characteristic of goafs closure several years ago were not detected. Water sump was used to temporarily store underground mine water and sediment of the whole mine, which collected the water and sediment from groundwater aquifers, rock roadways, coal roadways and goafs, etc. The mine water in the water

sumps was discharged to the surface Zhushui River after treatment. In order to research the effect of mine drainage on microbial community of the river, the mine drainage outlet (XJL1), the intersection of mine drainage and Zhushui River (XJL2), the upstream of Zhushui River (XJL3) and the downstream (XJL4) of Zhushui River were sampled.

**Table S1** Sampling place, concentrations of in-situ physicochemical parameters, major and trace chemical constituents of water samples in different zones of Xinjulong Coal Mine.

| Group | Sample name | sampling place                        | pH  | DO<br>mg/L | ORP<br>mV | K <sup>+</sup> +Na <sup>+</sup><br>mg/L | Ca <sup>2+</sup><br>mg/L | Mg <sup>2+</sup><br>mg/L | Fe <sup>3+</sup><br>mg/L | Fe <sup>2+</sup><br>mg/L | NH <sub>4</sub> <sup>+</sup><br>mg/L | Sr<br>mg/L | Cl <sup>-</sup><br>mg/L | SO <sub>4</sub> <sup>2-</sup><br>mg/L | HCO <sub>3</sub> <sup>-</sup><br>mg/L | CO <sub>3</sub> <sup>2-</sup><br>mg/L | NO <sub>3</sub> <sup>-</sup><br>mg/L | NO <sub>2</sub> <sup>-</sup><br>mg/L | TDS<br>mg/L | CO <sub>2</sub><br>mg/L | H <sub>2</sub> SiO <sub>3</sub><br>mg/L | COD<br>mg/L |
|-------|-------------|---------------------------------------|-----|------------|-----------|-----------------------------------------|--------------------------|--------------------------|--------------------------|--------------------------|--------------------------------------|------------|-------------------------|---------------------------------------|---------------------------------------|---------------------------------------|--------------------------------------|--------------------------------------|-------------|-------------------------|-----------------------------------------|-------------|
| GW    | XJL9        | Ordovician limestone aquifer          | 9.7 | 2.67       | -21.9     | 492.0                                   | 1.6                      | 1.4                      | 0.11                     | 0.09                     | 3.18                                 | 0.8        | 394.2                   | 310.4                                 | 138.6                                 | 57.5                                  | <LQ                                  | 0.02                                 | 1356        | <LQ                     | 4.1                                     | 5.19        |
|       | XJL13       | S <sub>3</sub> sandstone aquifer      | 7.9 | 4.57       | 152.5     | 1312.0                                  | 265.2                    | 128.2                    | 0.05                     | <LQ                      | 2.20                                 | 10.6       | 55.9                    | 3618.0                                | 236.5                                 | 4.8                                   | 0.08                                 | 0.42                                 | 5772        | <LQ                     | 12.1                                    | 6.62        |
|       | XJL27       | L <sub>3</sub> limestone aquifer      | 7.8 | 2.25       | 96.0      | 1210.4                                  | 63.1                     | 39.7                     | 0.16                     | <LQ                      | 2.05                                 | 7.5        | 211.2                   | 2246.5                                | 392.6                                 | —                                     | <LQ                                  | 0.11                                 | 4084        | 6.5                     | 16.0                                    | 3.25        |
| RR    | XJL14       | air inlet in No.1 auxiliary roadway   | 8.6 | 4.33       | 231.2     | 1378.6                                  | 283.7                    | 152.1                    | 0.04                     | 0.05                     | 0.01                                 | 6.9        | 121.1                   | 3767.4                                | 248.7                                 | 19.2                                  | 2.66                                 | 0.02                                 | 6098        | <LQ                     | 10.8                                    | 1.88        |
|       | XJL18       | No.2 auxiliary roadway drainage ditch | 8.4 | 4.02       | 177.2     | 734.2                                   | 348.0                    | 104.3                    | <LQ                      | <LQ                      | 1.89                                 | 10.9       | 299.1                   | 2231.3                                | 187.8                                 | —                                     | <LQ                                  | 0.04                                 | 4054        | 9.4                     | 13.9                                    | 1.64        |
|       | XJL19       | No.1 auxiliary roadway drainage ditch | 8.5 | 3.83       | 179.8     | 1044.7                                  | 333.5                    | 116.0                    | 0.05                     | <LQ                      | <LQ                                  | 10.4       | 236.8                   | 2932.7                                | 190.2                                 | 21.6                                  | 1.84                                 | 0.23                                 | 4962        | <LQ                     | 12.5                                    | 1.61        |
|       | XJL26       | No.2 auxiliary roadway                | 7.5 | 2.71       | 74.1      | 1002.5                                  | 337.5                    | 112.1                    | 0.13                     | 0.05                     | 0.20                                 | 11.2       | 242.1                   | 2833.5                                | 213.6                                 | 9.6                                   | 1.25                                 | 0.40                                 | 4780        | <LQ                     | 13.1                                    | 1.28        |
| CR    | XJL12       | 6305 pannel outside the closed        | 8.4 | 4.75       | 161.7     | 1412.5                                  | 261.2                    | 135.5                    | 0.06                     | <LQ                      | 0.01                                 | 6.3        | 131.7                   | 3626.6                                | 372.1                                 | 7.2                                   | 2.26                                 | 0.05                                 | 6016        | <LQ                     | 10.6                                    | 1.14        |
|       | XJL15       | wall of 2306 pannel                   | 7.2 | 2.84       | 171.4     | 1665.5                                  | 339.9                    | 120.4                    | 0.49                     | <LQ                      | 0.45                                 | 8.5        | 147.1                   | 4268.3                                | 380.4                                 | —                                     | <LQ                                  | 3.74                                 | 6950        | 12.9                    | 10.7                                    | 3.38        |
| goaf  | XJL16       | goaf closure in 2021                  | 7.3 | 2.96       | 254.6     | 2013.5                                  | 245.1                    | 85.3                     | 0.19                     | 0.19                     | 4.63                                 | 5.4        | 97.9                    | 4500.9                                | 646.1                                 | —                                     | <LQ                                  | 0.35                                 | 7614        | 9.4                     | 9.5                                     | 1.34        |

| Group                                | Sample name | sampling place                                  | pH   | DO<br>mg/L | ORP<br>mV | K <sup>+</sup> +Na <sup>+</sup><br>mg/L | Ca <sup>2+</sup><br>mg/L | Mg <sup>2+</sup><br>mg/L | Fe <sup>3+</sup><br>mg/L | Fe <sup>2+</sup><br>mg/L | NH <sub>4</sub> <sup>+</sup><br>mg/L | Sr<br>mg/L | Cl <sup>-</sup><br>mg/L | SO <sub>4</sub> <sup>2-</sup><br>mg/L | HCO <sub>3</sub> <sup>-</sup><br>mg/L | CO <sub>3</sub> <sup>2-</sup><br>mg/L | NO <sub>3</sub> <sup>-</sup><br>mg/L | NO <sub>2</sub> <sup>-</sup><br>mg/L | TDS<br>mg/L | CO <sub>2</sub><br>mg/L | H <sub>2</sub> SiO <sub>3</sub><br>mg/L | COD<br>mg/L |
|--------------------------------------|-------------|-------------------------------------------------|------|------------|-----------|-----------------------------------------|--------------------------|--------------------------|--------------------------|--------------------------|--------------------------------------|------------|-------------------------|---------------------------------------|---------------------------------------|---------------------------------------|--------------------------------------|--------------------------------------|-------------|-------------------------|-----------------------------------------|-------------|
|                                      | XJL23       | goaf closure in 2010                            | 7.1  | 2.86       | 117.7     | 1157.7                                  | 345.6                    | 157.4                    | 0.07                     | 0.05                     | 2.80                                 | 6.3        | 235.0                   | 3239.3                                | 403.8                                 | —                                     | <LQ                                  | 0.06                                 | 5462        | 23.6                    | 14.5                                    | 1.67        |
|                                      | XJL24       | goaf closure in 2012                            | 7.5  | 3.22       | 230.5     | 1066.4                                  | 313.4                    | 129.1                    | 0.08                     | <LQ                      | <LQ                                  | 9.5        | 246.8                   | 2900.1                                | 321.9                                 | —                                     | 1.12                                 | 0.01                                 | 4918        | 14.6                    | 15.4                                    | 1.30        |
|                                      | XJL25       | goaf closure in 2009                            | 7.1  | 2.70       | 98.5      | 869.7                                   | 365.7                    | 117.0                    | 0.09                     | <LQ                      | 2.03                                 | 9.3        | 258.2                   | 2559.3                                | 319.4                                 | —                                     | <LQ                                  | 0.01                                 | 4428        | 24.8                    | 15.4                                    | 1.14        |
| sump                                 | XJL17       | extend the lower water sump                     | 7.6  | 3.70       | 254.0     | 1546.9                                  | 291.7                    | 117.0                    | 0.26                     | <LQ                      | 0.01                                 | 6.9        | 154.9                   | 3899.9                                | 356.0                                 | —                                     | 3.18                                 | 0.02                                 | 6368        | 11.1                    | 11.2                                    | 1.51        |
|                                      | XJL20       | 1# water sump                                   | 8.2  | 3.75       | 150.8     | 1102.7                                  | 277.2                    | 117.9                    | 0.15                     | <LQ                      | <LQ                                  | 8.3        | 229.0                   | 2925.7                                | 221.4                                 | 13.4                                  | 2.46                                 | 0.17                                 | 4996        | <LQ                     | 11.1                                    | 1.80        |
|                                      | XJL21       | 2# water sump                                   | 7.7  | 2.70       | 66.5      | 1015.1                                  | 196.9                    | 74.1                     | <LQ                      | <LQ                      | 1.67                                 | 6.9        | 250.3                   | 2383.6                                | 186.8                                 | 12.0                                  | <LQ                                  | 0.01                                 | 4136        | <LQ                     | 11.1                                    | 1.52        |
|                                      | XJL22       | level 2 water sump                              | 8.1  | 2.73       | 135.5     | 1264.0                                  | 221.0                    | 73.1                     | 0.05                     | 0.30                     | 0.11                                 | 7.3        | 264.6                   | 2912.5                                | 239.0                                 | —                                     | <LQ                                  | 0.09                                 | 4890        | 4.3                     | 6.5                                     | 1.44        |
| SW                                   | XJL1        | mine drainage outlet                            | 7.8  | 5.33       | 87.4      | 1014.9                                  | 286.8                    | 78.3                     | 0.03                     | <LQ                      | 0.59                                 | 7.3        | 262.1                   | 2606.3                                | 197.0                                 | —                                     | 1.71                                 | 0.34                                 | 4448        | 5.3                     | 15.6                                    | 3.43        |
|                                      | XJL2        | intersection of mine drainage and Zhushui River | 7.7  | 2.62       | 208.6     | 986.6                                   | 278.0                    | 94.6                     | 0.03                     | <LQ                      | 0.63                                 | 7.2        | 270.8                   | 2584.0                                | 173.3                                 | —                                     | <LQ                                  | 14.42                                | 4402        | 17.6                    | 11.4                                    | 8.24        |
|                                      | XJL3        | upstream of Zhushui River                       | 8.9  | 7.35       | 150.2     | 577.4                                   | 138.0                    | 122.5                    | 0.05                     | <LQ                      | 0.20                                 | 3.3        | 259.3                   | 1469.4                                | 252.5                                 | —                                     | <LQ                                  | 1.92                                 | 2750        | 7.8                     | <LQ                                     | 7.92        |
|                                      | XJL4        | downstream of Zhushui River                     | 7.9  | 3.58       | 204.1     | 1000.7                                  | 277.2                    | 92.7                     | 0.05                     | <LQ                      | 0.63                                 | 7.0        | 265.6                   | 2612.4                                | 174.3                                 | —                                     | <LQ                                  | 12.28                                | 4436        | 12.3                    | 9.9                                     | 7.92        |
| Limit of Quantification (LQ)         |             |                                                 | 0.0  | 0.0        | -<br>2000 | 0.04                                    | 0.01                     | 0.05                     | 0.03                     | 0.03                     | 0.01                                 | 0.01       | 10                      | 10                                    | —                                     | —                                     | 0.08                                 | 0.01                                 | 20          | 0.1                     | 0.1                                     | 0.5         |
| Bounds of Absolute Error (precision) |             |                                                 | 0.02 | 0.10       | 1.0       | 50                                      | 2                        | 2                        | 0.1                      | 0.1                      | 0.25                                 | 0.5        | 4                       | 40                                    | 6                                     | 2                                     | 0.15                                 | 0.1                                  | 20          | 1.2                     | 0.5                                     | 0.2         |

Note: GW, RR, CR, goaf, sump and SW refer to groundwater aquifers, rock roadways, coal roadways, goafs, water sumps and surface waters, respectively. DO, ORP, TDS and COD refer to dissolved oxygen, oxidation-reduction potential, total dissolved solids and chemical oxygen demand, respectively.

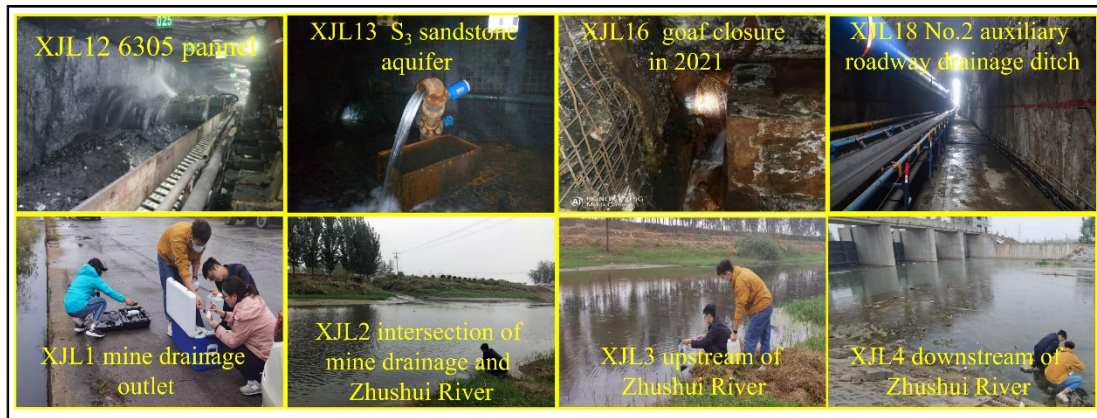

**Figure S1.** Representative field photos of sampling sites in Xinjulong Coal Mine and mine-water-discharged Zhushui River in Shandong Province, China.

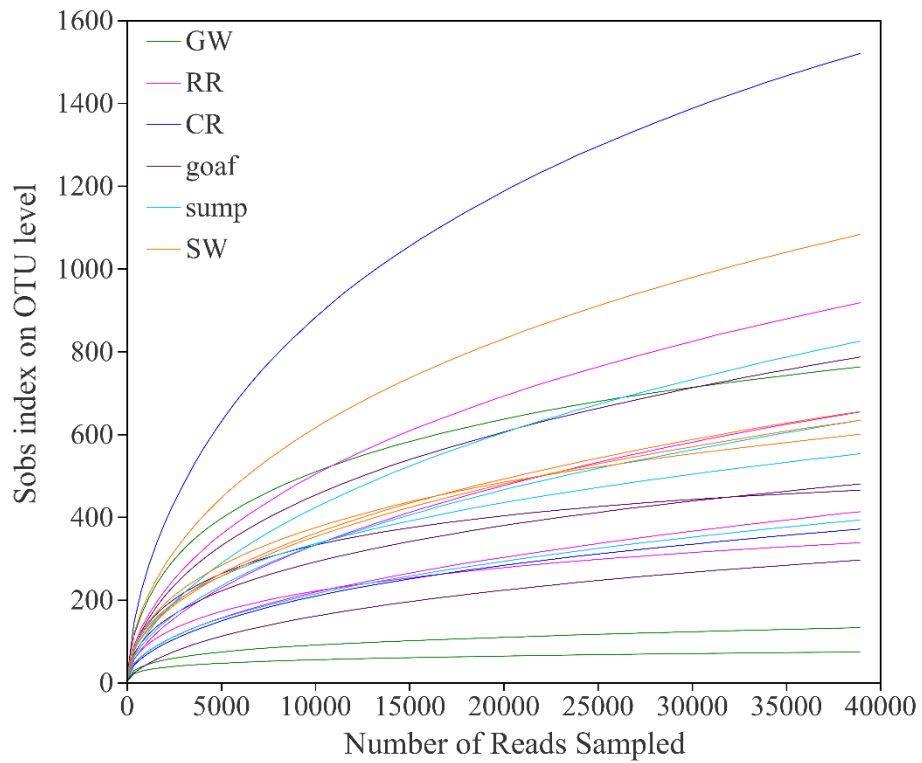

**Figure S2.** Rarefaction curves after flattening.

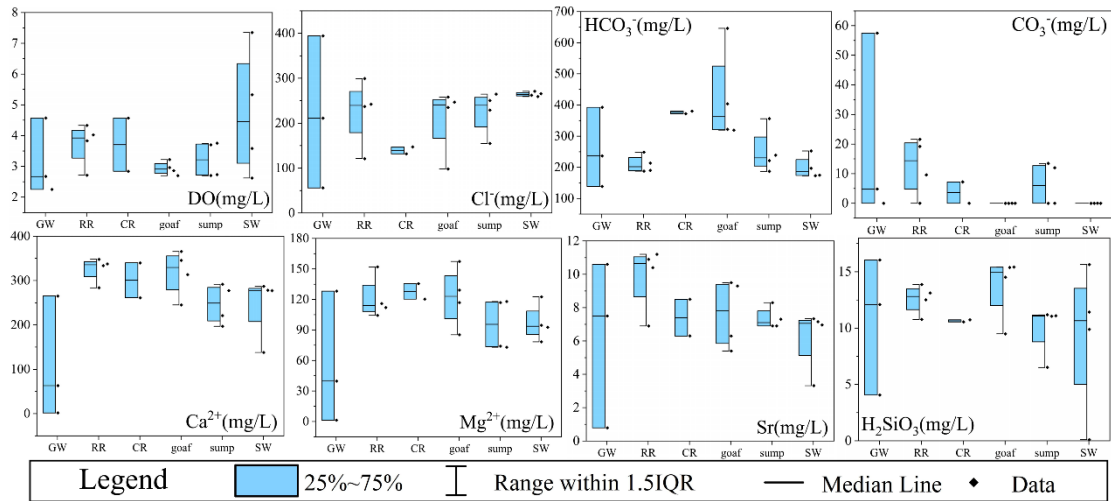

**Figure S3.** Half-box and whisker diagrams of the hydrochemical components in the six zones except for **Figure 4**. Note: GW, RR, CR, goaf, sump and SW refer to groundwater aquifers, rock roadways, coal roadways, goafs, water sumps and surface waters, respectively.

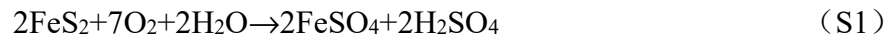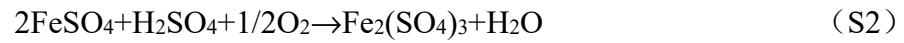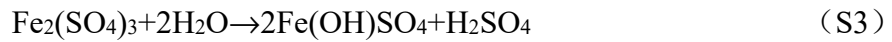

**Table S2** Alpha diversity of microbial community.

| Group | Sample name | Sequence | OTUs | Coverage (%) | Richness |         | Diversity |         |
|-------|-------------|----------|------|--------------|----------|---------|-----------|---------|
|       |             |          |      |              | ACE      | Chao1   | Shannon   | Simpson |
| GW    | XJL9        | 61841    | 73   | 99.96%       | 88.12    | 88      | 1.62      | 0.34    |
|       | XJL13       | 61206    | 762  | 99.51%       | 944.29   | 933     | 4.31      | 0.04    |
|       | XJL27       | 49812    | 132  | 99.89%       | 218.8    | 200.33  | 1.91      | 0.31    |
| RR    | XJL14       | 64092    | 412  | 99.50%       | 997.29   | 768.31  | 2.74      | 0.14    |
|       | XJL18       | 60940    | 917  | 99.05%       | 1693.65  | 1375.76 | 3.67      | 0.08    |
|       | XJL19       | 54909    | 653  | 99.25%       | 1358.83  | 1012.48 | 3.27      | 0.07    |
|       | XJL26       | 52183    | 337  | 99.76%       | 430.93   | 438.86  | 2.84      | 0.16    |
| CR    | XJL12       | 67922    | 1519 | 98.67%       | 2084.25  | 2100.91 | 4.71      | 0.04    |
|       | XJL15       | 54598    | 370  | 99.63%       | 659.32   | 545.05  | 2.48      | 0.19    |
| goaf  | XJL16       | 66979    | 479  | 99.59%       | 777.64   | 655.92  | 3.4       | 0.08    |
|       | XJL23       | 41385    | 664  | 99.79%       | 519.63   | 514.63  | 3.7       | 0.06    |
|       | XJL24       | 54314    | 295  | 99.69%       | 534.65   | 463.84  | 1.22      | 0.5     |
|       | XJL25       | 49446    | 786  | 99.23%       | 1434.64  | 1205.16 | 3.21      | 0.15    |
| sump  | XJL17       | 70923    | 392  | 99.57%       | 814.49   | 624.12  | 2.98      | 0.09    |
|       | XJL20       | 62955    | 552  | 99.49%       | 979.89   | 867.87  | 3.55      | 0.08    |
|       | XJL21       | 57794    | 824  | 99.07%       | 1661.9   | 1292.55 | 3.37      | 0.08    |



| Group | Sample name | Sequence | OTUs | Coverage (%) | Richness |         | Diversity |         |
|-------|-------------|----------|------|--------------|----------|---------|-----------|---------|
|       |             |          |      |              | ACE      | Chao1   | Shannon   | Simpson |
|       | XJL22       | 59291    | 633  | 99.26%       | 1387.76  | 1060.51 | 3.02      | 0.14    |
| SW    | XJL1        | 74250    | 633  | 99.35%       | 1178.71  | 943.06  | 3.69      | 0.06    |
|       | XJL2        | 73472    | 654  | 99.30%       | 1356.11  | 1040.75 | 3.69      | 0.06    |
|       | XJL3        | 57360    | 599  | 99.53%       | 795.43   | 806.56  | 3.39      | 0.11    |
|       | XJL4        | 63845    | 1082 | 98.95%       | 1604.21  | 1656.28 | 4.68      | 0.02    |

Note: GW, RR, CR, goaf, sump and SW refer to groundwater aquifers, rock roadways, coal roadways, goafs, water sumps and surface waters, respectively.

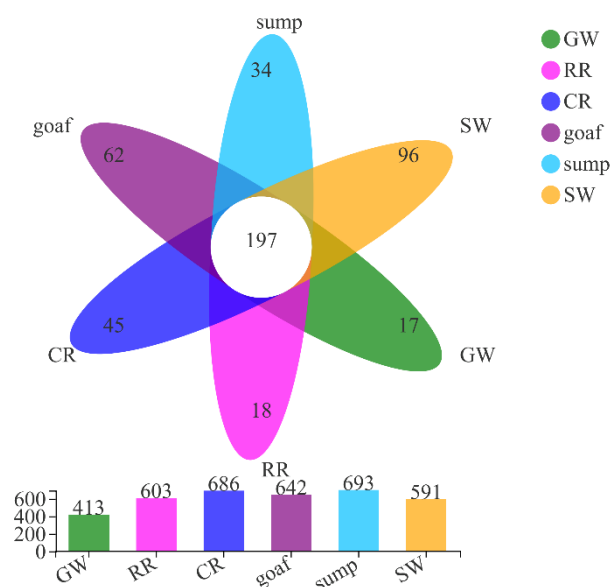

**Figure S4.** The numbers of core species, unique species and shared species of the microorganisms in the six zones of Xinjulong Coal Mine on genus level (Venn diagram). Note: GW, RR, CR, goaf, sump and SW refer to groundwater aquifers, rock roadways, coal roadways, goafs, water sumps and surface waters, respectively.

Beta diversity analysis (e.g., PCoA and ANOSIM) is commonly used to compare microbial community compositions through quantifying similarity and dissimilarity of microbial samples. According to the result of PCoA, two main factors that made the biggest contribution for differences between samples which were accounted for 32.66% and 19.84%, respectively (**Figure S5a**). ANOSIM further confirmed that six zones of water samples had significant differences ( $R^2=0.30$ ,  $p<0.05$ , **Figure S5b**). Compared

with other zones, the intragroup variations of microbial community structures in groundwater aquifers and coal roadways were higher, while those in surface waters and water sumps were lower.

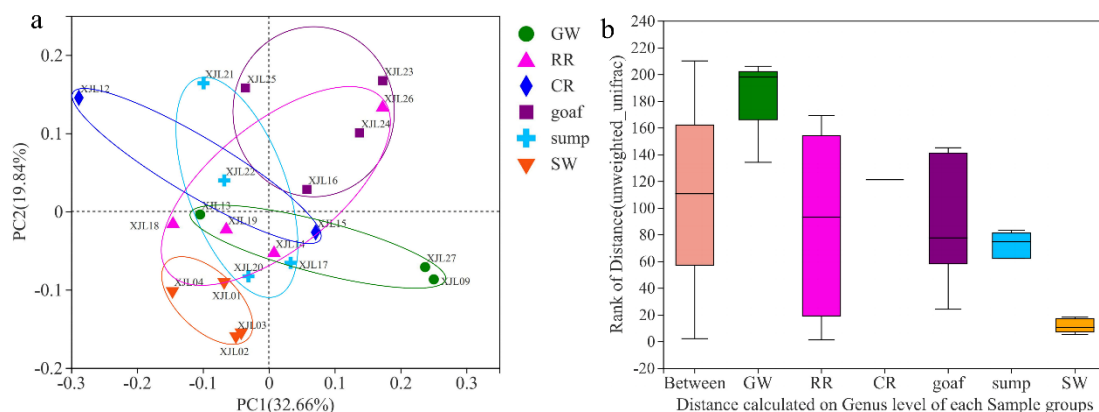

**Figure S5.** Beta diversity of microbial community. PCoA plot of microbial communities in water samples (a). ANOSIM of microbial communities in six different zones (b). Note: GW, RR, CR, goaf, sump and SW refer to groundwater aquifers, rock roadways, coal roadways, goafs, water sumps and surface waters, respectively.

**Table S3.** Microbial community structure of different zones water samples on different levels (Appendix I).

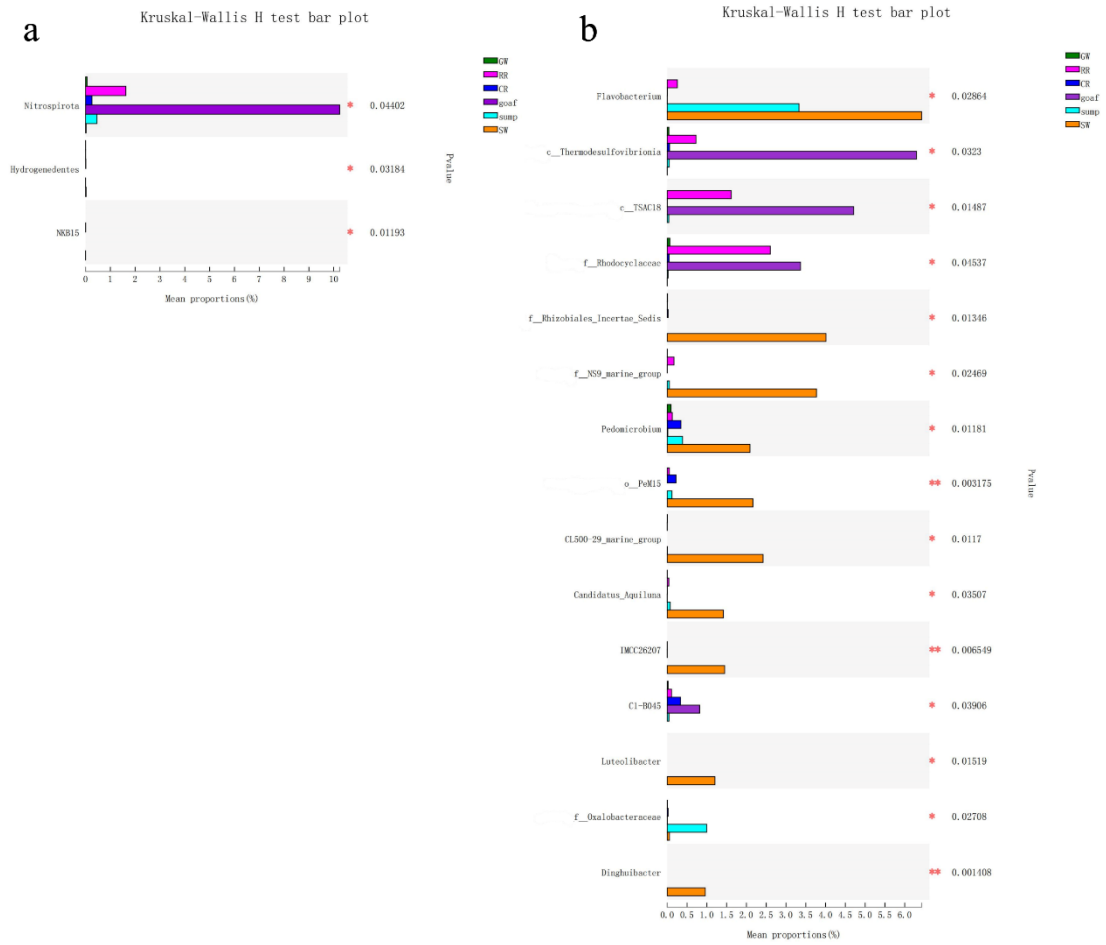

**Figure S6.** Kruskal-Wallis H test of distribution of microbial phyla (a) and genera (b) in different zons water samples. (\* $0.01 < p \leq 0.05$ , \*\*  $0.001 < p \leq 0.01$ ). Note: GW, RR, CR, goaf, sump and SW refer to groundwater aquifers, rock roadways, coal roadways, goafs, water sumps and surface waters, respectively.

**Table S4.** The envfit environment factors of RDA.

| Environmental variables       | RDA1   | RDA2   | $r^2$ | $p$ values |
|-------------------------------|--------|--------|-------|------------|
| pH                            | -0.750 | 0.661  | 0.021 | 0.818      |
| ORP                           | 0.186  | 0.983  | 0.189 | 0.17       |
| Ca                            | 0.810  | 0.586  | 0.016 | 0.859      |
| Fe <sup>3+</sup>              | 0.934  | -0.357 | 0.077 | 0.39       |
| Fe <sup>2+</sup>              | 0.382  | -0.924 | 0.109 | 0.245      |
| NH <sub>4</sub> <sup>+</sup>  | -0.104 | -0.995 | 0.388 | 0.019      |
| Cl <sup>-</sup>               | -0.655 | -0.756 | 0.094 | 0.412      |
| SO <sub>4</sub> <sup>2-</sup> | 0.949  | 0.316  | 0.101 | 0.383      |
| HCO <sub>3</sub> <sup>-</sup> | 0.326  | -0.945 | 0.039 | 0.677      |
| CO <sub>3</sub> <sup>2-</sup> | 0.302  | -0.953 | 0.236 | 0.132      |
| NO <sub>3</sub> <sup>-</sup>  | 0.862  | 0.507  | 0.120 | 0.32       |
| NO <sub>2</sub> <sup>-</sup>  | -0.831 | 0.557  | 0.213 | 0.149      |

| Environmental variables         | RDA1   | RDA2   | r <sup>2</sup> | p values |
|---------------------------------|--------|--------|----------------|----------|
| CO <sub>2</sub>                 | -0.874 | -0.486 | 0.108          | 0.326    |
| H <sub>2</sub> SiO <sub>3</sub> | 0.943  | -0.332 | 0.209          | 0.127    |
| COD                             | -0.886 | 0.463  | 0.440          | 0.014    |

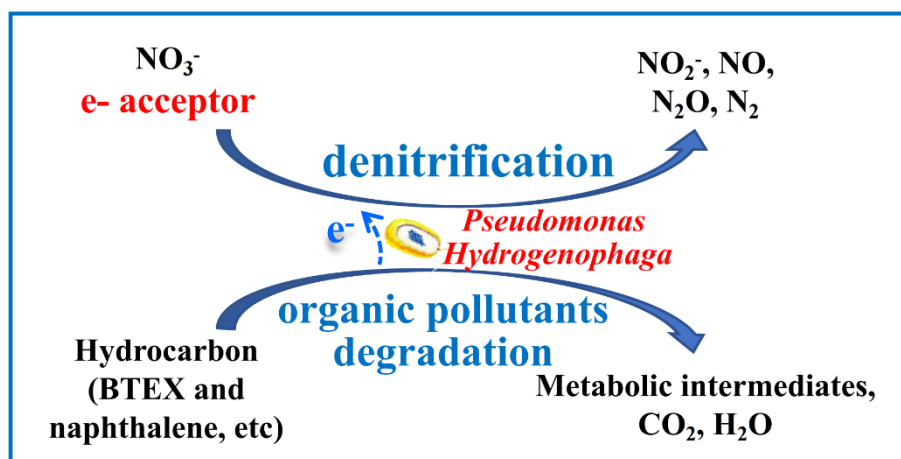

**Figure S7.** Conceptual model of hydrocarbon degradation by *Pseudomonas* and *Hydrogenophaga* with  $\text{NO}_3^-$  as an alternate electron acceptor.

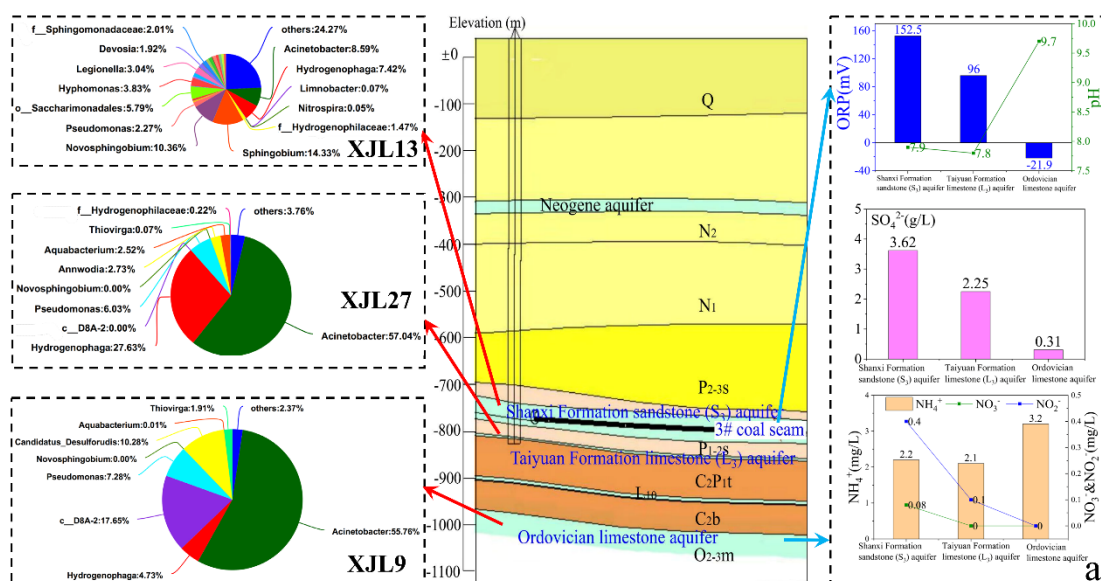

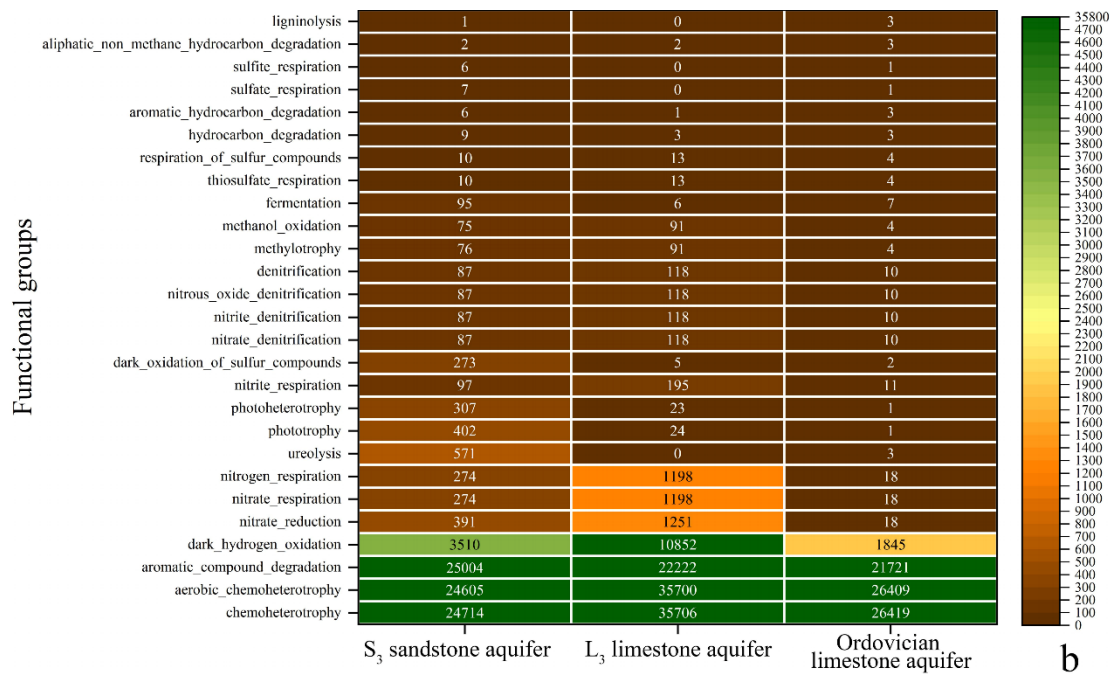

**Figure S8.** Vertical distribution characteristics of microbial community and hydrochemical composition in groundwater aquifers (a); FAPROTAX function prediction result of groundwater aquifers (b).

### The contribution calculation of mine drainage to Zhushui River

The waters from the mine drainage outlet (XJL1) and the upstream of Zhushui River (XJL3) were mixed and flowed into the downstream of Zhushui River (XJL4). To calculate the contribution of mine drainage to Zhushui River,  $\delta^2\text{H}$  and  $\delta^{18}\text{O}$  of these surface water samples were detected by gas stable isotope mass spectrometer (MAT253-EA, Thermo Fisher Scientific Co. LTD., USA). The detection results are presented in thousandth difference (‰) relative to Vienna Standard Mean Ocean Water (VSMOW), with the precision of  $\pm 2.0\text{‰}$  for  $\delta^2\text{H}$  and  $\pm 0.1\text{‰}$  for  $\delta^{18}\text{O}$ . As shown in [Table S5](#) and [Figure S9](#), the  $^2\text{H}$  and  $^{18}\text{O}$  abundance fractional isotope of XJL1 was obviously different with that of XJL3. The distances between the three sampling points were less than 1 km, so isotopic fractionation was negligible due to evaporation and water-rock interaction. On this basis, the isotope method ([Eq. S4–S5](#)) could be used to

calculate the contribution ratios of mine drainage and the upstream water to the downstream mixed water of Zhushui River (Qian and Ma, 2005). XJL1 and XJL3 were regarded as end-members samples, and XJL4 was regarded as a mixed sample.

$$\delta_1 \times R + \delta_3 \times (1 - R) = \delta_4 \quad (\text{S4})$$

$$R = \frac{\delta_4 - \delta_3}{\delta_1 - \delta_3} \quad (\text{S5})$$

where  $R$  is the contribution ratio of mine drainage to the downstream mixed water of Zhushui River;  $(1-R)$  is the contribution ratio of the upstream water to the downstream mixed water of Zhushui River;  $\delta_1$ ,  $\delta_3$  and  $\delta_4$  (‰) are  $\delta^2\text{H}$  or  $\delta^{18}\text{O}$  of XJL1, XJL3 and XJL4, respectively.

The calculated value of  $R$  is shown in Table S5, which indicated that the mine drainage accounted for 59–77% of the downstream flow.

**Table S5.** Calculation results of contribution ratio ( $R$ ) of mine drainage to Zhushui River downstream.

| Sample name                      | $\delta^2\text{H}$ (‰) | $R_I$  | $\delta^{18}\text{O}$ (‰) | $R_2$  |
|----------------------------------|------------------------|--------|---------------------------|--------|
| XJL1 mine drainage outlet        | -65.4                  |        | -9.35                     |        |
| XJL3 upstream of Zhushui River   | -54.1                  | 76.99% | -6.91                     | 59.43% |
| XJL4 downstream of Zhushui River | -62.8                  |        | -8.36                     |        |

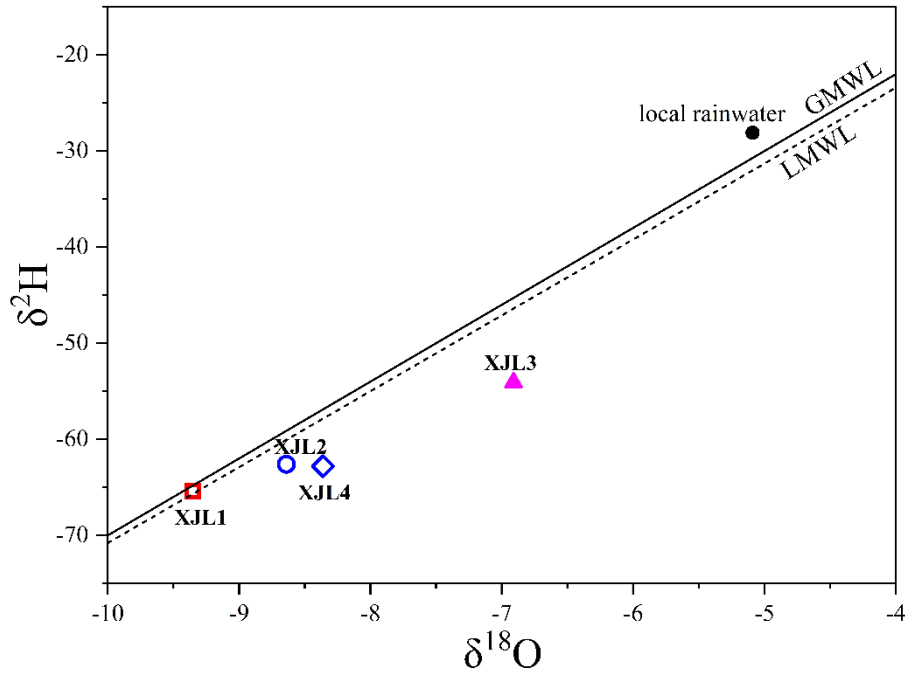

**Figure S9.**  $\delta^2\text{H}$ - $\delta^{18}\text{O}$  plot for water samples. Note: GMWL refers to the global meteoric water line; LMWL refers to the local meteoric water line.

**Table S6.** Comparison table of genus raw classification output and abbreviated names.

| Raw classification output names                          | Abbreviated names                   |
|----------------------------------------------------------|-------------------------------------|
| <i>norank_f_norank_o_norank_c_Thermodesulfovibrionia</i> | <i>c_Thermodesulfovibrionia</i>     |
| <i>norank_f_Rhodocyclaceae</i>                           | <i>f_Rhodocyclaceae</i>             |
| <i>norank_f_Rhizobiales_Incertae_Sedis</i>               | <i>f_Rhizobiales_Incertae_Sedis</i> |
| <i>norank_f_Hydrogenophilaceae</i>                       | <i>f_Hydrogenophilaceae</i>         |
| <i>unclassified_o_Burkholderiales</i>                    | <i>o_Burkholderiales</i>            |
| <i>norank_f_norank_o_Saccharimonadales</i>               | <i>o_Saccharimonadales</i>          |
| <i>unclassified_f_Rhodobacteraceae</i>                   | <i>f_Rhodobacteraceae</i>           |
| <i>norank_f_Desulfuromonadaceae</i>                      | <i>f_Desulfuromonadaceae</i>        |
| <i>Norank_f_Rhizobiales_Incertae_Sedis</i>               | <i>f_Rhizobiales_Incertae_Sedis</i> |

Note: Species annotated with "no rank" are those for which the sequences can be matched against the Silva v138 16S rRNA database at a taxonomic level, but no specific taxonomic information is available. In this case, a higher level of taxonomic information will be annotated in the statistics. In addition, "c", "o", and "f" represent Class, Order, and Family, respectively. For example, *norank\_f\_Rhodocyclaceae* is identified and named on genus level according to the database; the family level information of this genus has been determined, but the genus level has not been determined. Generally, *norank\_f\_Rhodocyclaceae* is considered to have a similar function to *Rhodocyclaceae*. Moreover, species annotated with "unclassified" are those for which the sequences

cannot be matched against the Silva v138 16S rRNA database with a confidence threshold of 0.7 at a taxonomic level.

## **REFERENCES**

Qian, H.; Ma, Z.Y. *Hydrogeochemistry*, 1st ed.; Geology Press: Beijing, China, 2005; pp. 134.
