# Supplementary material for: Coal Mining Activities Driving the Changes in Microbial Community and Hydrochemical Characteristics of Underground Mine Water
Source: Int J Environ Res Public Health. 2022 Oct 16;19(20):13359. doi: 10.3390/ijerph192013359 (PMC9603172; doi:10.3390/ijerph192013359)
Supplement: Supplementary file 1 [file ijerph-19-13359-s001.zip › Appendix I-Table S3.xlsx]

## Sheet: taxa.percents.table
Table S3. Microbial community structure of different zones water samples on different levels.							GW			RR				CR		goaf				sump				SW
Domain	Kingdom	Plyum	Class	Order	Family	Genus	XJL09	XJL13	XJL27	XJL14	XJL18	XJL19	XJL26	XJL12	XJL15	XJL16	XJL23	XJL24	XJL25	XJL17	XJL20	XJL21	XJL22	XJL01	XJL02	XJL03	XJL04
Bacteria	norank_d__Bacteria	Proteobacteria	Gammaproteobacteria	Pseudomonadales	Moraxellaceae	Acinetobacter	0.557558	0.0859006	0.57042	0.188848	0.0563771	0.304503	0.00847197	0.319624	0.0105771	0.0183046	0.0317314	0.937949	0.122176	0.178964	0.0351972	0.228948	0.0496765	0.0470322	0.0195112	0.024235	0.0668002
						Cavicella	0	0	0.00315773	7.70179e-05	0.000128363	2.56726e-05	0	0.00010269	0	0.0032861	2.56726e-05	0	0.0358903	7.70179e-05	0.00010269	0.00354282	0.0378158	0	2.56726e-05	0	0
						norank_f__Moraxellaceae	0	0.000462107	0.00467242	0.000385089	0.000359417	0.000564798	0	0.000513452	5.13452e-05	0.00780448	5.13452e-05	0.000179708	0.0640789	0.000128363	2.56726e-05	0.00359417	0.000770179	0	0	2.56726e-05	0
					Pseudomonadaceae	Pseudomonas	0.0728332	0.0226946	0.0602793	0.365527	0.0752721	0.139248	0.0251592	0.0108338	0.0347094	0.0124512	0.0485983	0.000667488	0.0304991	0.160967	0.0192288	0.0185613	0.021642	0.221888	0.00359417	0.0147874	0.0108082
				Burkholderiales	Comamonadaceae	Hydrogenophaga	0.0472633	0.0742452	0.276263	0.0829226	0.256906	0.066107	0	0.0438745	0.317647	0.282527	2.56726e-05	0.00282399	0.0366862	0.0773259	0.0883138	0.313001	0.629749	0.0292925	0.0115527	0.0146847	0.041718
					Burkholderiaceae	Limnobacter	0	0.000667488	0.0032861	0.00254159	0.00059047	0.00148901	0	0.0160967	0.00580201	0.00698295	0	0.000154036	0.338237	0.00097556	0.0030037	0.0929862	0.00189977	0.0011296	0.00059047	0.000256726	0.00228486
					Gallionellaceae	Candidatus_Nitrotoga	0	0	0	0	2.56726e-05	0	0.359365	2.56726e-05	0	0	0	0	0.0032861	0	0	0.000385089	0	0	0	0	0
					Rhodocyclaceae	norank_f__Rhodocyclaceae	0	0.000282399	0.00164305	2.56726e-05	7.70179e-05	0.000154036	0.103923	0.000385089	0.000539125	0.00611008	0.125488	0.0027213	0.000410762	0	5.13452e-05	0.000385089	0.000436435	2.56726e-05	0	0	0
						Thauera	2.56726e-05	0.000179708	0.00197679	0.000282399	0.0303707	0.00536558	0	0.00659786	0.000308071	0.0471093	0	2.56726e-05	0.00010269	0.000872869	0.019999	0.00164305	0.0184586	0.0725252	0.0280858	0.000205381	0.000359417
						C39	0	0	0	0	0	0	0	0	0	0	0	0	0	0	0	0	2.56726e-05	0.0132214	0.00284966	0	0.00197679
					Hydrogenophilaceae	norank_f__Hydrogenophilaceae	0	0.0147104	0.0021565	0.000359417	0.00269563	0.00274697	0.0141199	0.000359417	0.00826658	0.131932	0.00667488	0.000282399	0.00382522	0.000667488	0.000359417	0.000744506	0.00282399	7.70179e-05	2.56726e-05	0	0.00010269
						Annwodia	0	2.56726e-05	0.02729	0	0	2.56726e-05	0.00446704	0	0	2.56726e-05	0.00251592	0	7.70179e-05	0	0	0	0	0	0	0	0
					unclassified_o__Burkholderiales	unclassified_o__Burkholderiales	0	0.000231054	0.000308071	0	2.56726e-05	0	0.099276	0	0.000205381	0.00747073	0.0657733	0.000616143	0.00649517	0	5.13452e-05	0.00133498	0.000205381	0	0	0	0
					Comamonadaceae	unclassified_f__Comamonadaceae	0	0.000821524	0.000539125	0.000231054	0.00143767	0.00166872	0	0.00467242	0.00680325	0.00816389	5.13452e-05	0.000179708	0.00372253	0.000513452	0.00123229	0.00177141	0.0077788	0.000436435	0.0118351	0.000795851	0.00107825
						Aquabacterium	0.00010269	0.000308071	0.0252105	2.56726e-05	0.000179708	2.56726e-05	0	0.00128363	0	0.00939618	2.56726e-05	2.56726e-05	0.00867735	0	0.000308071	0.0010269	0.0134781	0.000154036	0.000359417	0.000128363	0.00133498
						Ottowia	0	5.13452e-05	2.56726e-05	2.56726e-05	7.70179e-05	5.13452e-05	0	0.00595605	2.56726e-05	0.000282399	0	7.70179e-05	0	0	0.0015917	0.0171236	0.00359417	0.00292668	0.00274697	0	0.00569932
						Tepidimonas	0	2.56726e-05	5.13452e-05	0.000179708	5.13452e-05	7.70179e-05	0	0.00010269	0.000385089	0.0207178	0	2.56726e-05	2.56726e-05	0	0	0.000256726	0.000616143	2.56726e-05	2.56726e-05	5.13452e-05	0
					Alcaligenaceae	Pigmentiphaga	0	0.0109365	0	0	0	0	0	0	0	0	0	0	0	0	0	0	0	0	0	0	0
					Oxalobacteraceae	norank_f__Oxalobacteraceae	0	0	0	0	0.00010269	0.00010269	0	0.000256726	0.000205381	0.00010269	0	0	2.56726e-05	0	0.000308071	0.0240296	0.0154549	0.000693161	0.000616143	0.000128363	0.000821524
				unclassified_c__Gammaproteobacteria	unclassified_c__Gammaproteobacteria	unclassified_c__Gammaproteobacteria	0	0.00254159	0	0.000154036	0.00195112	0.00213083	0.0494455	0.00290101	0.000179708	0.000847197	0.0249538	0.000154036	0.00133498	0.000616143	0.00249024	0.00059047	0.00097556	0.000872869	0.000462107	0.000898542	0.000282399
				Thiotrichales	Thiotrichaceae	Thiothrix	0	0	0	0	2.56726e-05	0	0	5.13452e-05	0	0	0	0	0	5.13452e-05	2.56726e-05	0	7.70179e-05	0.0560433	0.000462107	0	0.000179708
				Xanthomonadales	Rhodanobacteraceae	Aquimonas	0	2.56726e-05	0	2.56726e-05	0.0037482	0	0	0.000256726	0	0	0	0	5.13452e-05	0	0.0192801	0	0.00010269	0.0137349	0.00741939	0.00870302	0.000179708
					norank_o__Xanthomonadales	norank_f__norank_o__Xanthomonadales	0	0.0105001	0	0	0.00115527	0.000154036	0	0.000667488	0	0	0	0.000282399	0.000462107	0	0.00128363	0.000128363	0.000282399	7.70179e-05	0	2.56726e-05	2.56726e-05
				Legionellales	Legionellaceae	Legionella	0	0.0304221	0	0.000539125	0.000564798	0.000693161	0.000949887	0.00166872	0.00059047	0.000128363	0.000179708	7.70179e-05	0.000179708	0.000744506	0.000436435	0.000333744	0.000179708	0.00326042	0.00048778	0.00313206	0.00207948
				Cellvibrionales	Porticoccaceae	C1-B045	0	0.000641816	2.56726e-05	0.000385089	0.00295235	0.00100123	0	0.00462107	0.00210516	0.0311152	0.000333744	7.70179e-05	0.0011296	0.000179708	0.000256726	0.000282399	0.00097556	0	0	0	0
				Oceanospirillales	Alcanivoracaceae	Ketobacter	0	0.000462107	0.000205381	0	0.000179708	0	0	0.00184843	0	0.000154036	0	0	0.00831793	0	0.00010269	0.00133498	0.01584	2.56726e-05	0	0	0
				Acidithiobacillales	Acidithiobacillaceae	KCM-B-112	0	0.00182276	0	7.70179e-05	0.00105258	0.00100123	0	0.0210516	2.56726e-05	2.56726e-05	0	0.000359417	0.000154036	2.56726e-05	2.56726e-05	0.000154036	0.000641816	2.56726e-05	0	0	0
				Diplorickettsiales	Diplorickettsiaceae	norank_f__Diplorickettsiaceae	0	0.00266995	0	0.00010269	0.000462107	0.000359417	0	0.000410762	0.00059047	0	0	0	5.13452e-05	0.000359417	0.000205381	2.56726e-05	0.00010269	0.0174574	7.70179e-05	7.70179e-05	0.000128363
				Alteromonadales	Alteromonadaceae	Alishewanella	7.70179e-05	5.13452e-05	0.000333744	0.000231054	0.000333744	0.00010269	0	5.13452e-05	2.56726e-05	5.13452e-05	0	0	2.56726e-05	0.000231054	0.0205124	2.56726e-05	0.000693161	0.000128363	0	0	0
				Halothiobacillales	Halothiobacillaceae	Thiovirga	0.0191004	0	0.000744506	0	0	0	0	0	0	0.000205381	0	0	0	0	0	0	0.00100123	0	0	0	0
			Alphaproteobacteria	Rhodobacterales	Rhodobacteraceae	Rhodobacter	0	0.00636681	0.00059047	0.126669	0.0856695	0.116348	0	0.0547084	0.400519	0.0359417	2.56726e-05	0.000667488	0.00266995	0.189182	0.0860803	0.0915486	0.0408451	0.0931916	0.271283	0.0257753	0.070189
						unclassified_f__Rhodobacteraceae	0	0.00803553	0.00251592	0.0990963	0.0481618	0.110392	0	0.0454405	0.0588673	0.0104488	5.13452e-05	0.000744506	0.00593038	0.0650288	0.00854898	0.0655679	0.011527	0.0455176	0.09771	0.00639248	0.0198449
						Gemmobacter	0	0.0010269	0.000154036	0.0240039	0.0758369	0.030114	0	0.00888273	0.0169183	0.00277264	0	7.70179e-05	0.00184843	0.081716	0.00990963	0.0048778	0.00266995	0.0182019	0.0283682	0.000744506	0.012785
						Paracoccus	0.00010269	0.00192545	0.00233621	0.00454405	0.00847197	0.0317057	0	0.0182019	0.000718833	0.0237215	0.000513452	2.56726e-05	0.017252	0.0357106	0.00156603	0.00967858	0.00739372	0.00333744	0.00539125	0.00123229	0.00200246
						Thioclava	0	0.00195112	0.00010269	0.00426166	0.0103974	0.0120661	0	0.0308071	0.000410762	0.00310639	0	0	0.000718833	0.00736804	0.00274697	0.000898542	0.00169439	0.00269563	0.00118094	2.56726e-05	0.00205381
				Sphingomonadales	Sphingomonadaceae	Novosphingobium	2.56726e-05	0.103563	2.56726e-05	0.0490347	0.0851047	0.0881855	0	0.0140429	0.0352228	0.00557096	2.56726e-05	0.000128363	0.00361984	0.0201017	0.250231	0.0160197	0.0278291	0.00546827	0.0390994	0.00141199	0.0160967
						Sphingobium	0	0.143279	0	0.000436435	0.00195112	0	0	0.00231054	0.000308071	2.56726e-05	0	0	0	7.70179e-05	0.000333744	2.56726e-05	0.000154036	0	2.56726e-05	2.56726e-05	0.00739372
						unclassified_f__Sphingomonadaceae	0	0.020076	0	5.13452e-05	0.000154036	7.70179e-05	0	0.000462107	0	0	5.13452e-05	0	0.000256726	0	0.000154036	5.13452e-05	5.13452e-05	0	0.000308071	0.000539125	0.000205381
				Rhizobiales	Rhizobiaceae	Ciceribacter	0	0.000872869	0.000231054	0.000154036	0.0117837	0.0204611	0	0.00138632	0.0510628	0.000128363	7.70179e-05	0	5.13452e-05	0.0870302	0.000205381	0.000359417	7.70179e-05	0.0013093	0.000359417	0.000179708	0.00138632
						Nitratireductor	0	0.0118608	0	0	7.70179e-05	2.56726e-05	0.000333744	0.00259293	0.000205381	0.000410762	0.000847197	7.70179e-05	0.00192545	0	0	7.70179e-05	7.70179e-05	7.70179e-05	5.13452e-05	0	0.000128363
					Rhizobiales_Incertae_Sedis	norank_f__Rhizobiales_Incertae_Sedis	0	0.000231054	0	0	0.00010269	5.13452e-05	0	0.000436435	0	0	0	0	0	0	0	0	0	0.0342216	0.0167129	0.0815362	0.0279832
						Alsobacter	0	0	0	0	0	0	0	0	0	0	0	0	0	0	0	0	0	0	0.00978127	0.000308071	0.0207178
					Hyphomicrobiaceae	Pedomicrobium	0	0.00279832	0	0.000949887	0.00318341	0.000924214	2.56726e-05	0.00495482	0.00195112	0.000308071	0	2.56726e-05	0.000179708	0.00816389	0.00172007	0.000359417	0.00523722	0.0129903	0.0115784	0.0168926	0.0421288
					Devosiaceae	Devosia	0	0.0191518	0	0.00118094	0.00115527	0.00059047	0	0.0059047	0.000410762	0.000436435	0	2.56726e-05	7.70179e-05	0.010038	0.000718833	0.000436435	2.56726e-05	7.70179e-05	0.000436435	0.00236188	0.00297802
						norank_f__Devosiaceae	0	0.017329	0	0	2.56726e-05	5.13452e-05	0	0.000179708	0	2.56726e-05	0	0	0	2.56726e-05	0	0	0	0.00356849	0.00854898	0.00541692	0.00747073
					Xanthobacteraceae	Xanthobacter	0	0.0137605	0	2.56726e-05	0.00220785	0.000154036	0	5.13452e-05	0	0.000154036	0	0	0	2.56726e-05	0.0015917	0	0	0	2.56726e-05	2.56726e-05	0
				Elsterales	Elsteraceae	Elstera	0	0.000462107	0	0	0.00749641	2.56726e-05	0	0	0	0	0	0	0	0	0.106028	0	0	0	0	0	0
				Caulobacterales	Hyphomonadaceae	Hyphomonas	0	0.0382779	0	0.00246457	0.0367632	0.00284966	0	0.00395358	0	0.00115527	0	0	0.00138632	0.00310639	0.00688026	0.000256726	0.000231054	0.00408195	0.00192545	0.00282399	0.00207948
					Caulobacteraceae	Phenylobacterium	0	0.00798419	2.56726e-05	0.000898542	0.0205124	0.00741939	0	0.00128363	0.00010269	0.00125796	0	0	0.00200246	0.000205381	0.00554529	0.000641816	0.00097556	0.00338879	0.000462107	0.000821524	0.000154036
				Micavibrionales	norank_o__Micavibrionales	norank_f__norank_o__Micavibrionales	0	0.0034658	0	0	0.0169953	0.00048778	0	7.70179e-05	2.56726e-05	5.13452e-05	0	0	0.000693161	2.56726e-05	0.00672623	0.000231054	2.56726e-05	0	2.56726e-05	0	2.56726e-05
				Azospirillales	Azospirillaceae	Azospirillum	0	0.00978127	0	2.56726e-05	0.00120661	2.56726e-05	0	0.00010269	0	0.000282399	0	2.56726e-05	0	5.13452e-05	0.0165845	0.00010269	2.56726e-05	7.70179e-05	5.13452e-05	2.56726e-05	2.56726e-05
		Actinobacteriota	Actinobacteria	Corynebacteriales	Mycobacteriaceae	Mycobacterium	0	0.000667488	0	5.13452e-05	0.00059047	0.000436435	0	0.00323475	0	0	5.13452e-05	0	0.000205381	0	5.13452e-05	0.000128363	0.000154036	2.56726e-05	0.00282399	0.449759	0.00623845
					Nocardiaceae	Gordonia	0	0.0166615	0	0.000154036	0.00010269	0.000179708	0	0.0167642	0	2.56726e-05	0	0	0.00010269	0.000205381	0	0.000205381	0.000744506	5.13452e-05	0	2.56726e-05	2.56726e-05
				PeM15	norank_o__PeM15	norank_f__norank_o__PeM15	0	0	0	0.00010269	0.00118094	0.000898542	0	0.00120661	0.00318341	0	0	0	0	0.00264428	0.0010269	0.000308071	0.000718833	0.025955	0.0112446	0.0246971	0.0246457
				Micrococcales	Microbacteriaceae	Candidatus_Aquiluna	0	5.13452e-05	0	0	0.00156603	2.56726e-05	0	0	7.70179e-05	2.56726e-05	0	0	0	0	0.00290101	0.00010269	2.56726e-05	0.0126823	0.0311152	0.00636681	0.00657219
					Ilumatobacteraceae	unclassified_f__Ilumatobacteraceae	0	0	0	0	0	0	0	0	0	0	0	0	0	0	0	2.56726e-05	0	5.13452e-05	0.00223352	0	0.0285223
						CL500-29_marine_group	0	0.000154036	0	0	2.56726e-05	0	0	0	0	0	0	0	0	5.13452e-05	5.13452e-05	7.70179e-05	0	0.00333744	0.0561974	0.0030037	0.0342473
					norank_o__Microtrichales	norank_f__norank_o__Microtrichales	0	0.000154036	0	0.000179708	2.56726e-05	0.000128363	0	0.0140943	5.13452e-05	0	0	7.70179e-05	0.000308071	5.13452e-05	0	0.000564798	0.000128363	0.00105258	0.00133498	0.000847197	0.00711132
					Microtrichaceae	IMCC26207	0	0	0	0	0	0	0	2.56726e-05	0	0	0	0	2.56726e-05	0	0	0	0	0.00649517	0.00641816	0.0110906	0.0339906
				Corynebacteriales	Dietziaceae	Dietzia	0	0.00382522	0	0.000539125	0.000308071	0.000770179	2.56726e-05	0.0276751	0.000205381	0.000359417	0.000770179	5.13452e-05	0.0113216	0.00266995	0.000128363	0.00708564	0.00356849	0	0	0	0
				Pseudonocardiales	Pseudonocardiaceae	Crossiella	0	0	0	0.000128363	0.000462107	0.000898542	0	0.011681	0.000231054	0	0	0	2.56726e-05	5.13452e-05	0	0.000154036	2.56726e-05	2.56726e-05	0	0	0
				Actinomarinales	norank_o__Actinomarinales	norank_f__norank_o__Actinomarinales	0	0.00356849	0	7.70179e-05	5.13452e-05	5.13452e-05	0	0.0120405	2.56726e-05	0.000718833	2.56726e-05	0	0.000154036	2.56726e-05	0	0.00010269	7.70179e-05	0	0	0	0.00010269
			Thermoleophilia	Gaiellales	norank_o__Gaiellales	norank_f__norank_o__Gaiellales	0	0.00010269	0	7.70179e-05	0.000385089	0.000359417	0.0598172	0.00333744	0.000898542	5.13452e-05	0.125411	0.000308071	0.000667488	0.000847197	0.000231054	0.000436435	0.000410762	0.00308071	0.00128363	0.00010269	0.00182276
		Firmicutes	TSAC18	norank_c__TSAC18	norank_o__norank_c__TSAC18	norank_f__norank_o__norank_c__TSAC18	0	0	0	0	2.56726e-05	5.13452e-05	0.064541	2.56726e-05	2.56726e-05	0.0121175	0.161506	0.00867735	0.0061871	2.56726e-05	0	0.00151468	0	0	0	0	0
			D8A-2	norank_c__D8A-2	norank_o__norank_c__D8A-2	norank_f__norank_o__norank_c__D8A-2	0.176525	0	2.56726e-05	0	0	0	0.000205381	0	0	0	0.000282399	0	0	0	0	0	0	0	0	0	0
			unclassified_p__Firmicutes	unclassified_p__Firmicutes	unclassified_p__Firmicutes	unclassified_p__Firmicutes	0.00957589	0.00097556	0	0	2.56726e-05	7.70179e-05	0.0210259	0.000128363	0	0.00136065	0.0677757	0.0011296	0.000462107	0	0	0.000641816	7.70179e-05	0	0	0	0
			Desulfotomaculia	Ammonifexales	Desulforudaceae	Candidatus_Desulforudis	0.102845	0	0	0	0	0	0	0	0	0	0	0	0	0	0	0	0	0	0	0	0
					Ammonificaceae	Thermodesulfitimonas	0.00048778	0	0.000693161	0	0	0	0.00302937	0	0	0	0.0319111	0.00010269	0.00059047	0	0	5.13452e-05	0	0	0	0	0
			Bacilli	Exiguobacterales	Exiguobacteraceae	Exiguobacterium	0	0.000616143	0.000179708	0.000154036	0	0	0.0116297	0.00292668	0	0	0.00495482	0.000128363	0	0.00259293	0	0	5.13452e-05	0.00010269	0.00238755	0.00605874	0.00662354
				Bacillales	Bacillaceae	Bacillus	0	7.70179e-05	0	5.13452e-05	0.00010269	0.000154036	5.13452e-05	0.000410762	2.56726e-05	0	0.000308071	0	0.00238755	7.70179e-05	0	0	0	0.000641816	0.00338879	0.0138632	0.00423598
			Clostridia	Peptostreptococcales-Tissierellales	Fusibacteraceae	Fusibacter	0	2.56726e-05	0	2.56726e-05	2.56726e-05	0	0	0.000205381	0	5.13452e-05	0	0	0	0.000539125	0.010269	2.56726e-05	0.00100123	0	0	0.00059047	0
		Bacteroidota	Bacteroidia	Flavobacteriales	Flavobacteriaceae	Flavobacterium	0	0	0	0.00318341	0.00670055	0.000308071	0	7.70179e-05	2.56726e-05	7.70179e-05	0	0	0	0.000872869	0.13224	0	2.56726e-05	0.10133	0.135526	0.0168669	0.00331177
						unclassified_f__Flavobacteriaceae	0	0.0124255	0	0.000205381	0.0018741	0.000462107	0	0.00251592	0	0	0	0	0.000179708	5.13452e-05	5.13452e-05	0	2.56726e-05	2.56726e-05	2.56726e-05	0	5.13452e-05
					NS9_marine_group	norank_f__NS9_marine_group	0	7.70179e-05	0	2.56726e-05	0.0067519	0	0	2.56726e-05	0	0	0	0	0	2.56726e-05	0.0021565	2.56726e-05	0	0.0405627	0.0333744	0.0491374	0.0277778
					Weeksellaceae	Cloacibacterium	0	0	0	0	0.00575067	0.0018741	0	0	0	0.00048778	0	0	0	5.13452e-05	0.0115527	0	2.56726e-05	2.56726e-05	0.000333744	0	0.000128363
				Chitinophagales	Chitinophagaceae	Dinghuibacter	0	0	0	0	0	0	0	0	0	0	0	0	0	0	0	0	0	0.00400493	0.0178425	0.00336311	0.0132214
				Sphingobacteriales	LiUU-11-161	norank_f__LiUU-11-161	0	0	0	0	0	0	0	0	0	0	0	0	0	0	2.56726e-05	0	0	0	0.000256726	0.0134268	0.000385089
		Nitrospirota	Thermodesulfovibrionia	norank_c__Thermodesulfovibrionia	norank_o__norank_c__Thermodesulfovibrionia	norank_f__norank_o__norank_c__Thermodesulfovibrionia	0	0.000128363	0.00107825	5.13452e-05	0.000308071	0.000308071	0.0283682	0.00115527	2.56726e-05	0.1918	0.0567622	0.00105258	0.00220785	2.56726e-05	0.000128363	0.00148901	0.000462107	0	0	0	2.56726e-05
			Nitrospiria	Nitrospirales	Nitrospiraceae	Nitrospira	0	0.00048778	0	0	0.000128363	0	0.0355566	0.00292668	0	0.000154036	0.0263401	0.00857466	0.12174	2.56726e-05	0	0.0157887	0.000231054	2.56726e-05	0	0	0.00100123
		Patescibacteria	Saccharimonadia	Saccharimonadales	norank_o__Saccharimonadales	norank_f__norank_o__Saccharimonadales	0	0.0579431	0	0.00048778	0.00123229	0.00146334	0	0.00349148	0.000282399	0	5.13452e-05	0.000462107	0.00048778	0.000256726	0.000205381	0.000539125	0.000128363	0.00793284	0.00172007	0.0048778	0.0940388
			Gracilibacteria	Candidatus_Peregrinibacteria	norank_o__Candidatus_Peregrinibacteria	norank_f__norank_o__Candidatus_Peregrinibacteria	0	0.00179708	0	0.000205381	0.00428733	0.00136065	0	0.00105258	0.00182276	5.13452e-05	0	0	2.56726e-05	0.000205381	0.00261861	0.000128363	0.000179708	0.000924214	0.00236188	0.00125796	0.0461594
				norank_c__Gracilibacteria	norank_o__norank_c__Gracilibacteria	norank_f__norank_o__norank_c__Gracilibacteria	0	0.00354282	0	0.00105258	0.000693161	0.000641816	0	0.000385089	0.000256726	0	0	2.56726e-05	2.56726e-05	0.011296	7.70179e-05	5.13452e-05	0.000462107	7.70179e-05	0.000359417	0.000128363	0.000308071
			Parcubacteria	Candidatus_Kaiserbacteria	norank_o__Candidatus_Kaiserbacteria	norank_f__norank_o__Candidatus_Kaiserbacteria	2.56726e-05	0.000462107	0	0.000462107	0.00695728	0.000359417	7.70179e-05	0.00136065	0.000539125	0.000256726	0.000385089	0.000205381	0.000770179	2.56726e-05	0.00220785	0.000641816	0.000359417	0.00107825	0.00207948	5.13452e-05	0.0261347
				Candidatus_Wolfebacteria	norank_o__Candidatus_Wolfebacteria	norank_f__norank_o__Candidatus_Wolfebacteria	0	0	2.56726e-05	2.56726e-05	0.000333744	0.000128363	0.00418464	2.56726e-05	0.000205381	0.0107055	0.00644383	0.00010269	0	2.56726e-05	0.000154036	2.56726e-05	0	7.70179e-05	5.13452e-05	0	0
		Verrucomicrobiota	Verrucomicrobiae	Verrucomicrobiales	Verrucomicrobiaceae	Prosthecobacter	0	0.00510885	0	0	0.00010269	5.13452e-05	0	2.56726e-05	0	0	0	0	2.56726e-05	0	0	2.56726e-05	0.00010269	0	0.00164305	0.0416153	0.035916
					Rubritaleaceae	Luteolibacter	0	0	0	0	0	0	0	0	0	0	0	0	0	0	0	0	0	0	0.000128363	0.0161224	0.0319111
				Chthoniobacterales	Terrimicrobiaceae	Terrimicrobium	0	0.00125796	0	0	2.56726e-05	0	0	0	0	0	0	0	0	0	0	0	2.56726e-05	2.56726e-05	0.000282399	0.00626412	0.0114243
			Chlamydiae	Chlamydiales	Parachlamydiaceae	Neochlamydia	0	0.0154036	0	0	0	5.13452e-05	0	0.00010269	0	0	0	0	0	2.56726e-05	0	2.56726e-05	0	0	0	0.000795851	0.0010269
			Verrucomicrobiae	Pedosphaerales	Pedosphaeraceae	DEV114	0	0	0	0	0	0	0	0	0	0	0	0	0	0	0	0	0	0.000462107	0.00010269	2.56726e-05	0.0138889
		unclassified_k__norank_d__Bacteria	unclassified_k__norank_d__Bacteria	unclassified_k__norank_d__Bacteria	unclassified_k__norank_d__Bacteria	unclassified_k__norank_d__Bacteria	7.70179e-05	0.00200246	0	5.13452e-05	0.00059047	0.000436435	0.00680325	0.00120661	0.000564798	0.00010269	0.0184586	0.00213083	0.00872869	0.000179708	0.000154036	0.00115527	0.00010269	0.0011296	0.00010269	0.000179708	0.00115527
		DTB120	norank_p__DTB120	norank_c__norank_p__DTB120	norank_o__norank_c__norank_p__DTB120	norank_f__norank_o__norank_c__norank_p__DTB120	0	0.000513452	0	0	0	0	0.0103974	7.70179e-05	0	0.000616143	0.0305247	0.00010269	0.00010269	0	0	0.000154036	2.56726e-05	0	0	0	0
		Cyanobacteria	Sericytochromatia	norank_c__Sericytochromatia	norank_o__norank_c__Sericytochromatia	norank_f__norank_o__norank_c__Sericytochromatia	0	0.00128363	0	0.00292668	0.000693161	0.000231054	0.00231054	0.00097556	0.000128363	0.0111933	0.00197679	0.000359417	0.00205381	0.0145307	0.000256726	0.00118094	7.70179e-05	0.000256726	0.000821524	0.000462107	7.70179e-05
		Bdellovibrionota	Bdellovibrionia	Bacteriovoracales	Bacteriovoracaceae	Peredibacter	0	2.56726e-05	0	0.000795851	0.000359417	0	0	7.70179e-05	0	2.56726e-05	0	0	5.13452e-05	0.000385089	0	0.000128363	5.13452e-05	7.70179e-05	0.0347864	0.000513452	0
		Campilobacterota	Campylobacteria	Campylobacterales	Arcobacteraceae	Pseudarcobacter	0	0	0.00048778	0	0.000333744	0.00100123	0	0	0	0.0153779	0	0	0	5.13452e-05	0	0.000770179	5.13452e-05	2.56726e-05	0.000282399	0	0
		Acidobacteriota	Acidobacteriae	Subgroup_2	norank_o__Subgroup_2	norank_f__norank_o__Subgroup_2	0	0	0	0	0	0	0.0107825	0	0	0	0.00359417	0.00277264	5.13452e-05	0	0	5.13452e-05	0	0	0	0	0
others							0.0133754	0.197782	0.012939	0.0322448	0.10364	0.0377388	0.0756572	0.25077	0.0356593	0.0734494	0.154446	0.0252619	0.136578	0.0316287	0.11355	0.063052	0.0665434	0.0792	0.0654395	0.113832	0.16641
